# Supplementary material for: Inhibition of Cdc42 activity extends lifespan and decreases circulating inflammatory cytokines in aged female C57BL/6 mice
Source: PubMed Central journal article supplement (PMC7511875; doi:10.1111/acel.13208), 2020-08-04
Supplement: ACEL-19-e13208-s001.pdf [file ACEL-19-e13208-s001.pdf]

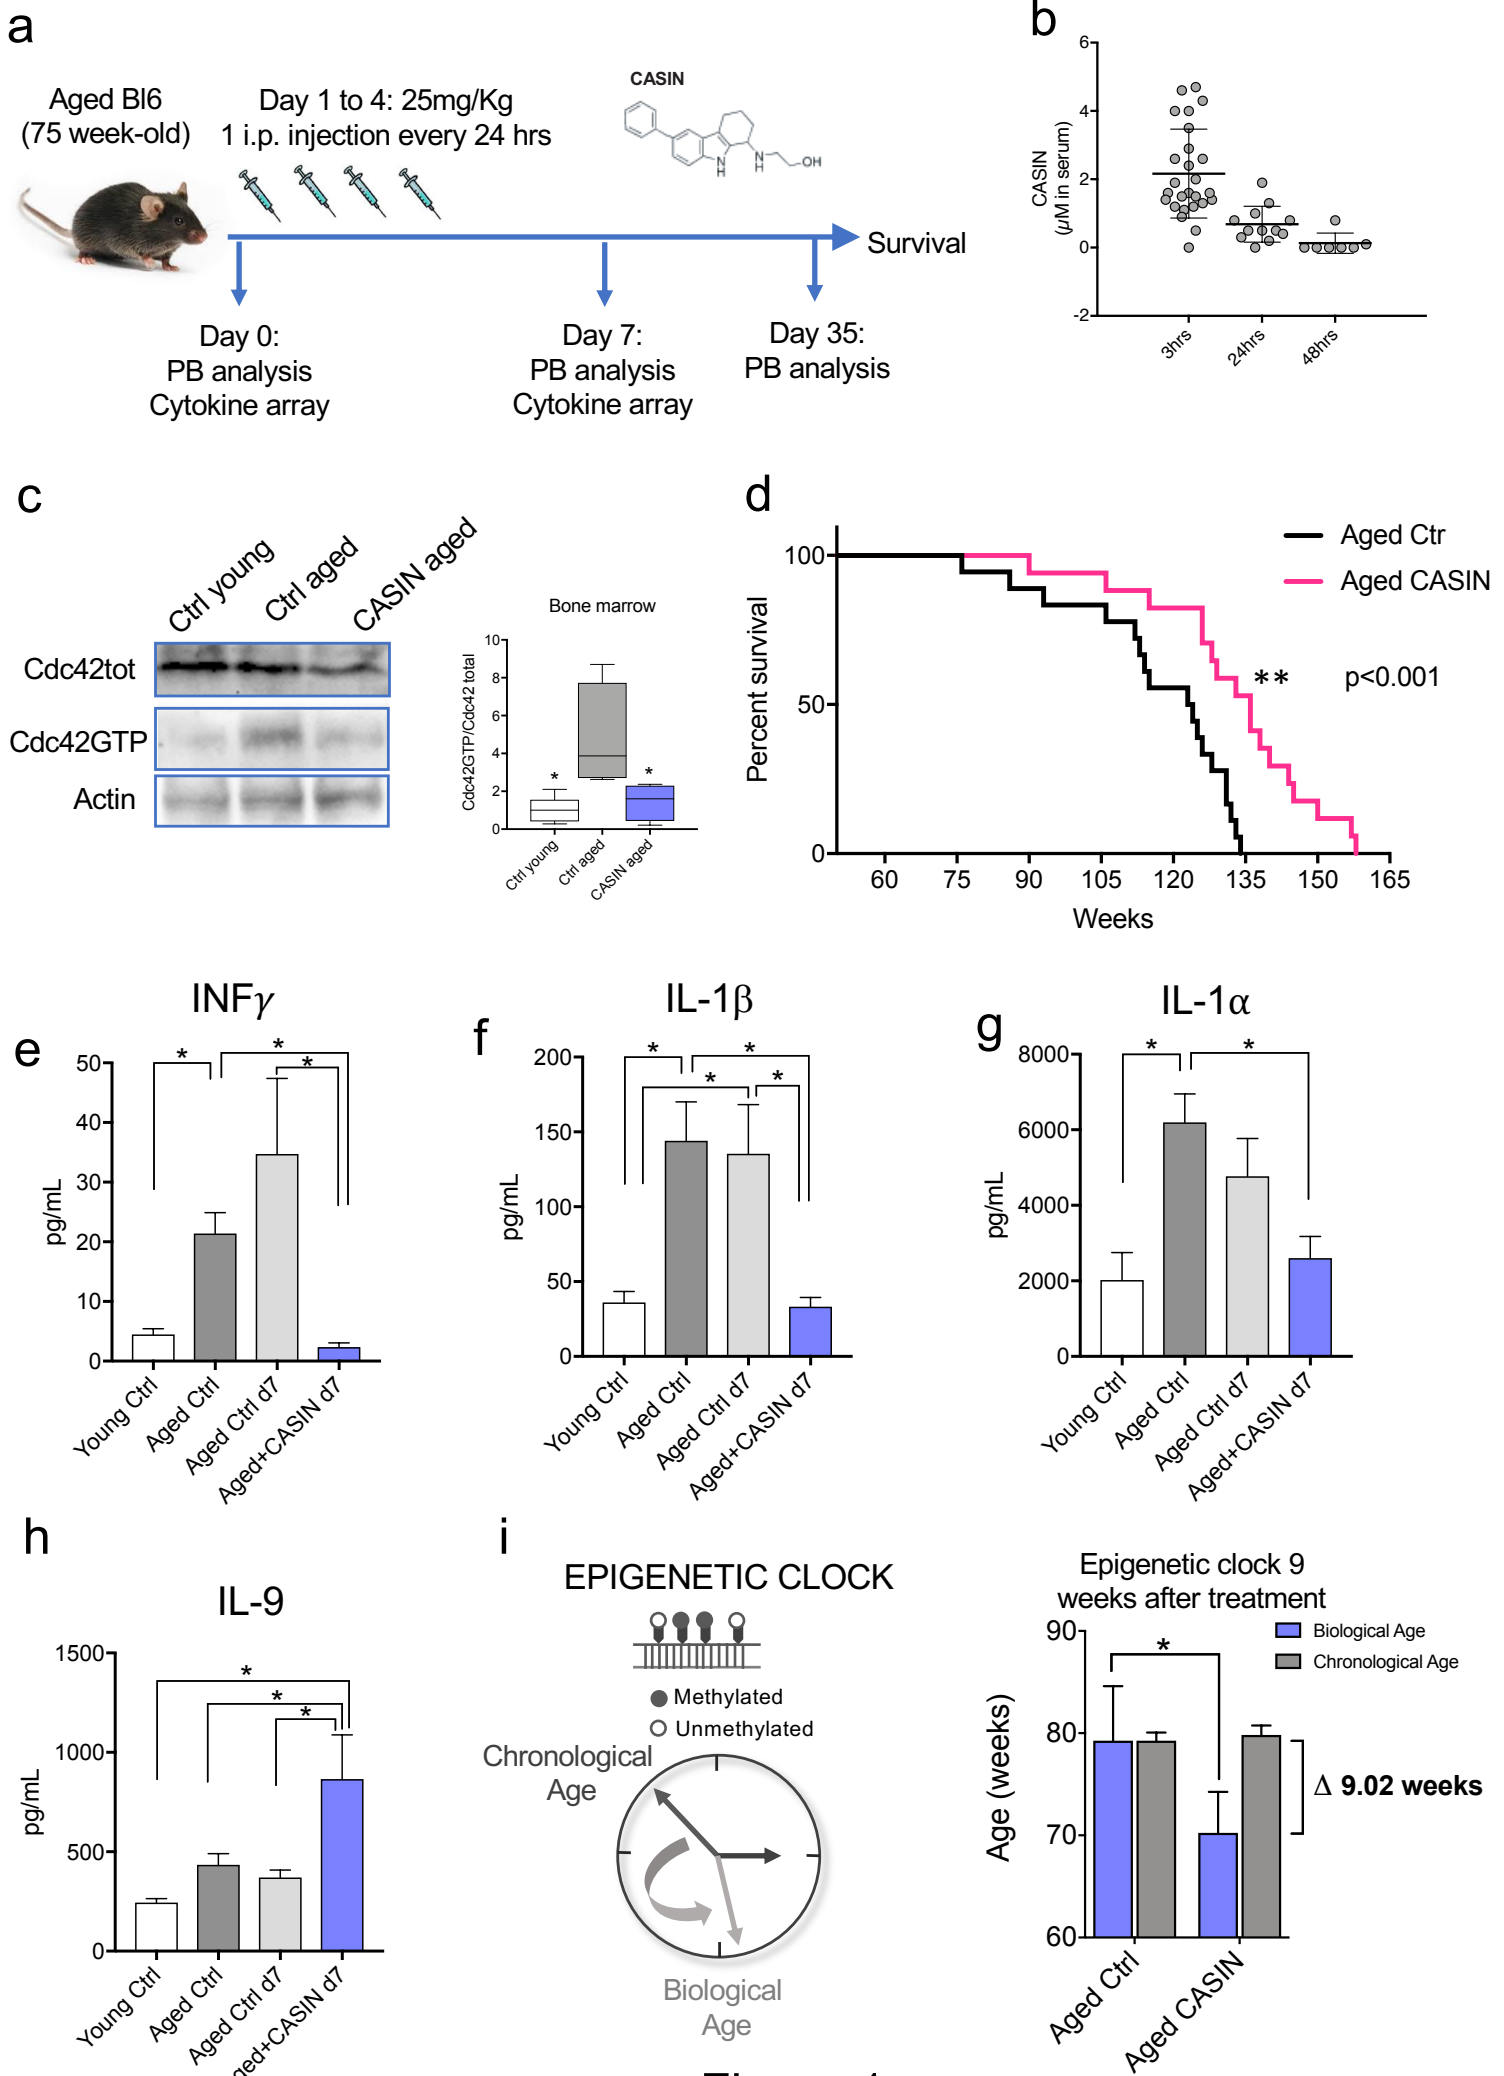

Figure 1

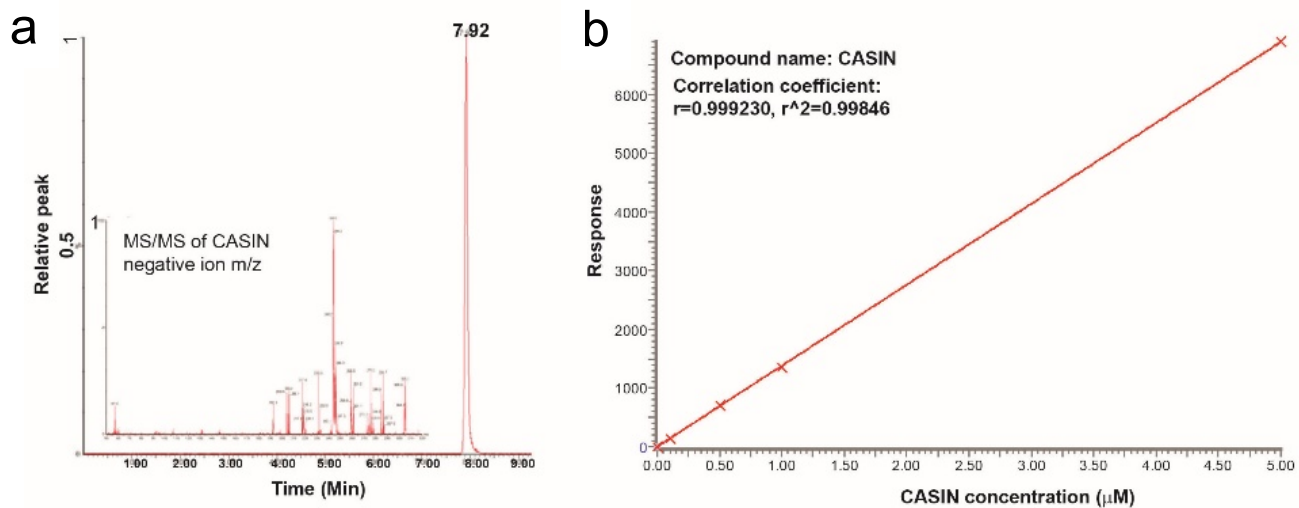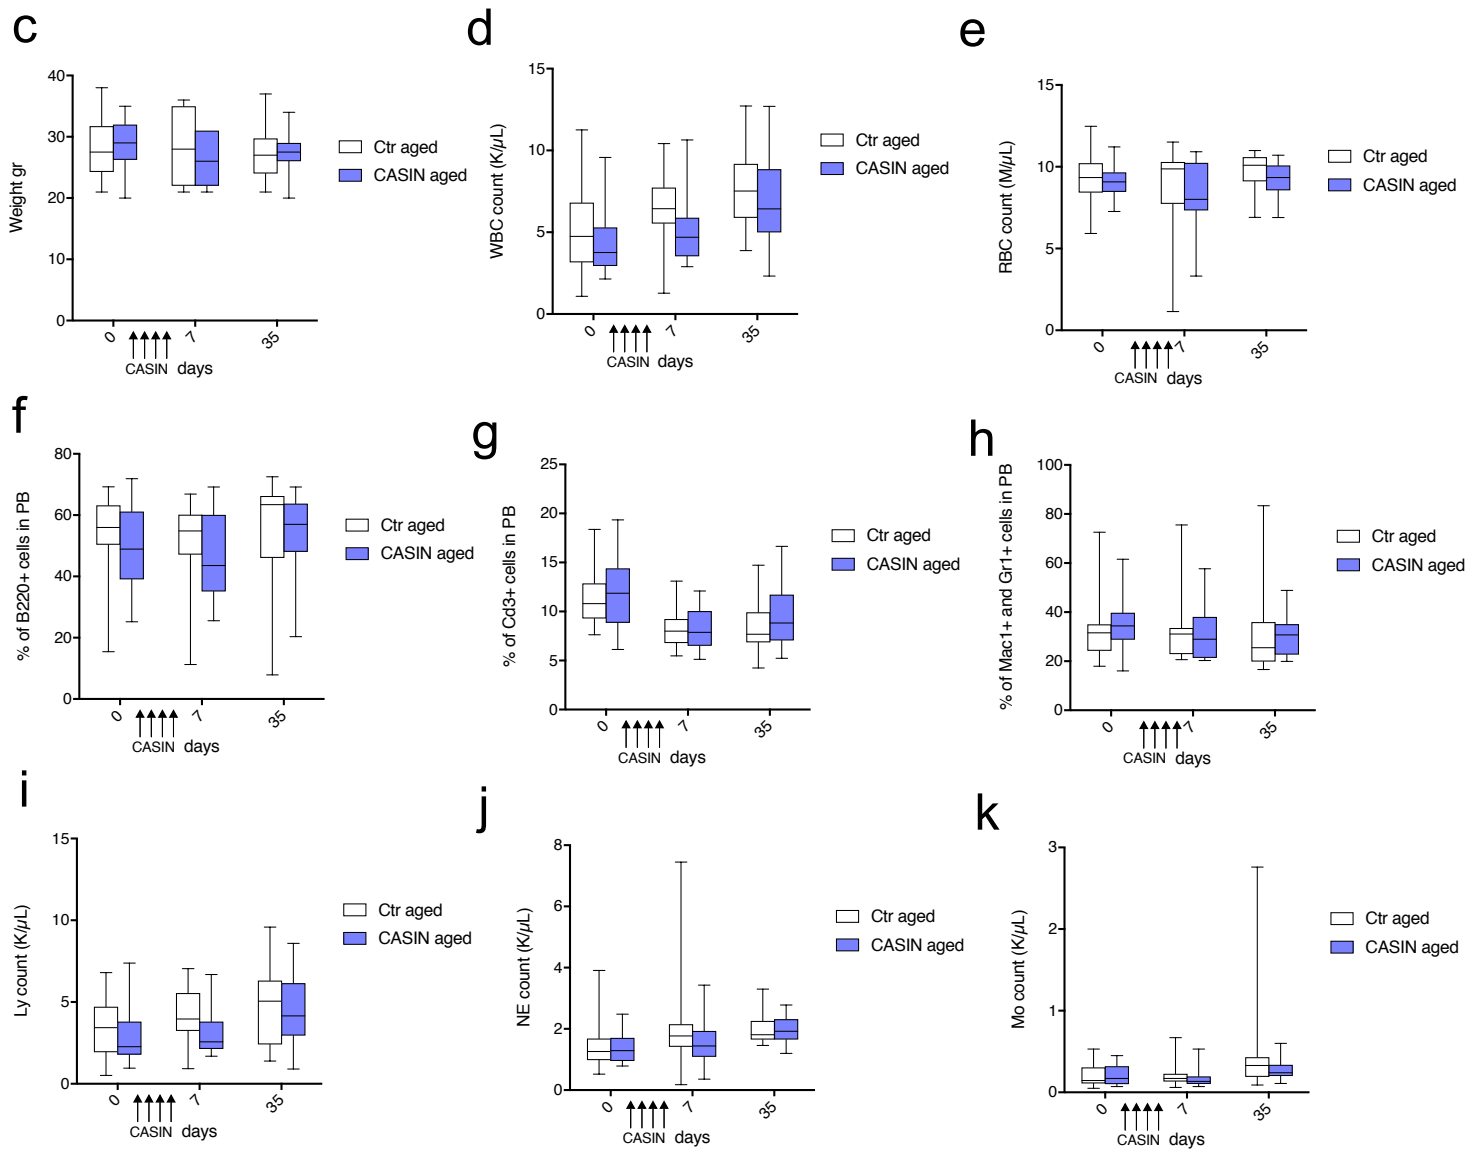

Supplementary Figure 1

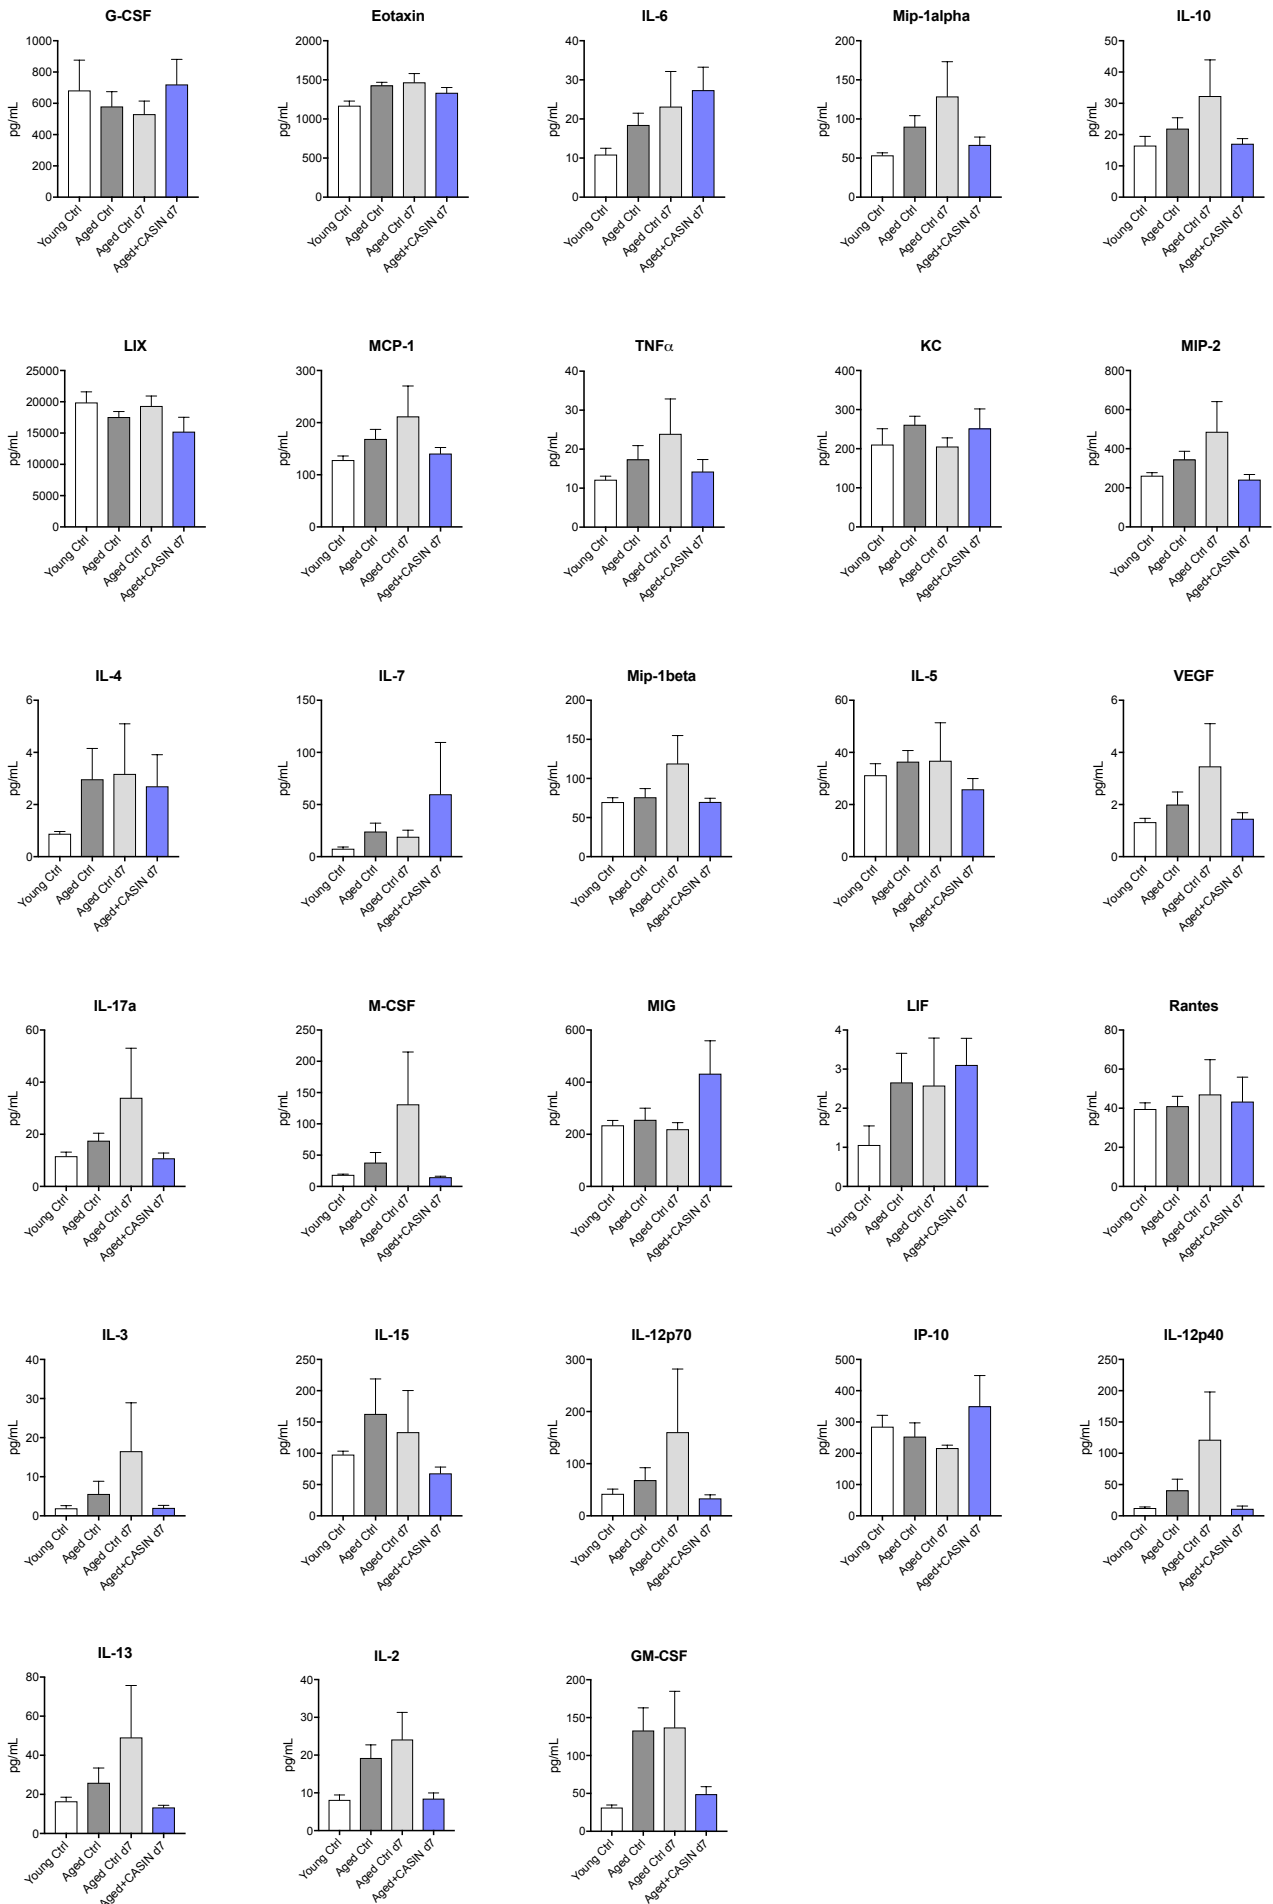

Supplementary Figure 2
